# Supplementary material
Source: publisher figshare collection journal article supplement (https://acs.figshare.com/ndownloader/files/6905201)
Supplement: Supplementary file 1 [file 6905201]

 
data_1 
 
_audit_creation_method            SHELXL-97 
_chemical_name_systematic 
; 
 ? 
; 
_chemical_name_common             ? 
_chemical_melting_point           ? 
_chemical_formula_moiety          ? 
_chemical_formula_sum 
 'C24 H21 N O6' 
_chemical_formula_weight          419.42 
 
loop_ 
 _atom_type_symbol 
 _atom_type_description 
 _atom_type_scat_dispersion_real 
 _atom_type_scat_dispersion_imag 
 _atom_type_scat_source 
 'C'  'C'   0.0033   0.0016 
 'International Tables Vol C Tables 4.2.6.8 and 6.1.1.4' 
 'H'  'H'   0.0000   0.0000 
 'International Tables Vol C Tables 4.2.6.8 and 6.1.1.4' 
 'N'  'N'   0.0061   0.0033 
 'International Tables Vol C Tables 4.2.6.8 and 6.1.1.4' 
 'O'  'O'   0.0106   0.0060 
 'International Tables Vol C Tables 4.2.6.8 and 6.1.1.4' 
 
_symmetry_cell_setting            'Triclinic' 
_symmetry_space_group_name_H-M    'P-1' 
 
loop_ 
 _symmetry_equiv_pos_as_xyz 
 'x, y, z' 
 '-x, -y, -z' 
 
_cell_length_a                    7.3578(5) 
_cell_length_b                    12.1840(10) 
_cell_length_c                    13.0111(10) 
_cell_angle_alpha                 86.190(2) 
_cell_angle_beta                  75.871(2) 
_cell_angle_gamma                 74.332(2) 
_cell_volume                      1089.10(14) 
_cell_formula_units_Z             2 
_cell_measurement_temperature     299(2) 
_cell_measurement_reflns_used     9918 
_cell_measurement_theta_min       2.96 
_cell_measurement_theta_max       28.25 
 
_exptl_crystal_description        'block' 
_exptl_crystal_colour             'red' 
_exptl_crystal_size_max           0.20 
_exptl_crystal_size_mid           0.15 
_exptl_crystal_size_min           0.10 
_exptl_crystal_density_meas       ? 
_exptl_crystal_density_diffrn     1.279 
_exptl_crystal_density_method     'not measured' 
_exptl_crystal_F_000              440 
_exptl_absorpt_coefficient_mu     0.092 
_exptl_absorpt_correction_type    'multi-scan'
_exptl_absorpt_correction_T_min   0.9817 
_exptl_absorpt_correction_T_max   0.9908 
_exptl_absorpt_process_details    'sadabs' 
 
_exptl_special_details 
; 
 ? 
; 
 
_diffrn_ambient_temperature       299(2) 
_diffrn_radiation_wavelength      0.71073 
_diffrn_radiation_type            MoK\a 
_diffrn_radiation_source          'fine-focus sealed tube' 
_diffrn_radiation_monochromator   graphite 
_diffrn_measurement_device_type   'CCD area detector' 
_diffrn_measurement_method        'phi and omega scan' 
_diffrn_detector_area_resol_mean  ? 
_diffrn_standards_number          ? 
_diffrn_standards_interval_count  ? 
_diffrn_standards_interval_time   ? 
_diffrn_standards_decay_%         ? 
_diffrn_reflns_number             21510 
_diffrn_reflns_av_R_equivalents   0.0216 
_diffrn_reflns_av_sigmaI/netI     0.0184 
_diffrn_reflns_limit_h_min        -8 
_diffrn_reflns_limit_h_max        9 
_diffrn_reflns_limit_k_min        -15 
_diffrn_reflns_limit_k_max        15 
_diffrn_reflns_limit_l_min        -16 
_diffrn_reflns_limit_l_max        16 
_diffrn_reflns_theta_min          2.37 
_diffrn_reflns_theta_max          26.00 
_reflns_number_total              4239 
_reflns_number_gt                 3368 
_reflns_threshold_expression      >2sigma(I) 
 
_computing_data_collection        ? 
_computing_cell_refinement        ? 
_computing_data_reduction         ? 
_computing_structure_solution     'SHELXS-97 (Sheldrick, 1990)' 
_computing_structure_refinement   'SHELXL-97 (Sheldrick, 1997)' 
_computing_molecular_graphics     ? 
_computing_publication_material   ? 
 
_refine_special_details 
; 
 Refinement of F^2^ against ALL reflections.  The weighted R-factor wR and 
 goodness of fit S are based on F^2^, conventional R-factors R are based 
 on F, with F set to zero for negative F^2^. The threshold expression of 
 F^2^ > 2sigma(F^2^) is used only for calculating R-factors(gt) etc. and is 
 not relevant to the choice of reflections for refinement.  R-factors based 
 on F^2^ are statistically about twice as large as those based on F, and R- 
 factors based on ALL data will be even larger. 
; 
 
_refine_ls_structure_factor_coef  Fsqd  
_refine_ls_matrix_type            full 
_refine_ls_weighting_scheme       calc  
_refine_ls_weighting_details 
 'calc w=1/[\s^2^(Fo^2^)+(0.1151P)^2^+0.1254P] where P=(Fo^2^+2Fc^2^)/3' 
_atom_sites_solution_primary      direct 
_atom_sites_solution_secondary    difmap 
_atom_sites_solution_hydrogens    geom 
_refine_ls_hydrogen_treatment     mixed 
_refine_ls_extinction_method      none 
_refine_ls_extinction_coef        ? 
_refine_ls_number_reflns          4239 
_refine_ls_number_parameters      340 
_refine_ls_number_restraints      72 
_refine_ls_R_factor_all           0.0753 
_refine_ls_R_factor_gt            0.0560 
_refine_ls_wR_factor_ref          0.1936 
_refine_ls_wR_factor_gt           0.1744 
_refine_ls_goodness_of_fit_ref    1.145 
_refine_ls_restrained_S_all       1.165 
_refine_ls_shift/su_max           0.000 
_refine_ls_shift/su_mean          0.000 
 
loop_ 
 _atom_site_label 
 _atom_site_type_symbol 
 _atom_site_fract_x 
 _atom_site_fract_y 
 _atom_site_fract_z 
 _atom_site_U_iso_or_equiv 
 _atom_site_adp_type 
 _atom_site_occupancy 
 _atom_site_symmetry_multiplicity 
 _atom_site_calc_flag 
 _atom_site_refinement_flags 
 _atom_site_disorder_assembly 
 _atom_site_disorder_group 
O4A O -0.0482(14) 0.7348(7) 0.3661(8) 0.0734(17) Uani 0.761(14) 1 d PU A 1 
C22A C -0.2043(7) 0.7433(7) 0.4594(5) 0.0953(17) Uani 0.761(14) 1 d PU A 1 
H22A H -0.3267 0.7561 0.4391 0.114 Uiso 0.761(14) 1 calc PR A 1 
H22B H -0.2120 0.8073 0.5024 0.114 Uiso 0.761(14) 1 calc PR A 1 
C23A C -0.1693(7) 0.6387(8) 0.5200(6) 0.136(3) Uani 0.761(14) 1 d PU A 1 
H23A H -0.1794 0.5773 0.4809 0.204 Uiso 0.761(14) 1 calc PR A 1 
H23B H -0.2638 0.6476 0.5865 0.204 Uiso 0.761(14) 1 calc PR A 1 
H23C H -0.0414 0.6217 0.5328 0.204 Uiso 0.761(14) 1 calc PR A 1 
O4B O -0.029(4) 0.709(2) 0.353(2) 0.061(4) Uani 0.239(14) 1 d PU A 2 
C22B C -0.205(2) 0.6952(15) 0.4367(14) 0.075(4) Uani 0.239(14) 1 d PU A 2 
H22C H -0.3223 0.7437 0.4199 0.090 Uiso 0.239(14) 1 calc PR A 2 
H22D H -0.2124 0.6168 0.4385 0.090 Uiso 0.239(14) 1 calc PR A 2 
C23B C -0.188(2) 0.728(2) 0.5429(15) 0.119(7) Uani 0.239(14) 1 d PU A 2 
H23D H -0.0614 0.6891 0.5535 0.178 Uiso 0.239(14) 1 calc PR A 2 
H23E H -0.2854 0.7067 0.5979 0.178 Uiso 0.239(14) 1 calc PR A 2 
H23F H -0.2049 0.8087 0.5450 0.178 Uiso 0.239(14) 1 calc PR A 2 
C24 C 0.2797(3) 0.84053(18) 0.43152(16) 0.0663(5) Uani 1 1 d . A 1 
H24 H 0.2717 0.8934 0.3767 0.080 Uiso 1 1 calc R A 1 
N1 N 0.1145(2) 0.86632(14) 0.12630(12) 0.0617(4) Uani 1 1 d . A 1 
H1 H 0.0088 0.9049 0.1139 0.093 Uiso 1 1 d R A 1 
O3 O -0.1939(2) 0.90263(15) 0.31397(12) 0.0847(5) Uani 1 1 d . A 1 
C1 C -0.0574(3) 0.82116(19) 0.30260(15) 0.0613(5) Uani 1 1 d . A 1 
C2 C 0.3147(2) 0.75420(15) 0.21600(14) 0.0534(4) Uani 1 1 d . A 1 
C3 C 0.2965(3) 0.84605(17) 0.06162(14) 0.0594(5) Uani 1 1 d . A 1 
C4 C 0.4253(2) 0.77607(15) 0.11547(14) 0.0548(4) Uani 1 1 d . A 1 
C5 C 0.7438(3) 0.66605(14) -0.00942(14) 0.0552(4) Uani 1 1 d . A 1 
C6 C 0.6429(3) 0.74042(17) 0.08330(16) 0.0611(5) Uani 1 1 d . A 1 
C7 C 0.3338(2) 0.72550(15) 0.40966(14) 0.0530(4) Uani 1 1 d . A 1 
O6 O 0.5103(3) 0.59072(14) 0.27649(14) 0.0929(6) Uani 1 1 d . A 1 
C8 C 0.1221(2) 0.81150(16) 0.21904(14) 0.0564(5) Uani 1 1 d . A 1 
O2 O 0.1905(2) 0.94151(19) -0.08411(13) 0.1027(7) Uani 1 1 d . A 1 
C9 C 0.3226(3) 0.89802(19) -0.04331(16) 0.0683(6) Uani 1 1 d . A 1 
O5 O 0.7305(2) 0.77105(19) 0.13844(16) 0.1072(7) Uani 1 1 d . A 1 
C10 C 0.3936(2) 0.68216(15) 0.29979(16) 0.0577(5) Uani 1 1 d . A 1 
C11 C 0.9443(3) 0.65006(18) -0.04677(18) 0.0722(6) Uani 1 1 d . A 1 
H11 H 1.0097 0.6881 -0.0147 0.087 Uiso 1 1 calc R A 1 
C12 C 0.6483(3) 0.60964(17) -0.05733(17) 0.0699(5) Uani 1 1 d . A 1 
H12 H 0.5150 0.6198 -0.0333 0.084 Uiso 1 1 calc R A 1 
C13 C 1.0437(4) 0.5791(2) -0.1299(2) 0.0912(8) Uani 1 1 d . A 1 
H13 H 1.1769 0.5688 -0.1544 0.109 Uiso 1 1 calc R A 1 
C14 C 0.3419(3) 0.6479(2) 0.49229(19) 0.0786(6) Uani 1 1 d . A 1 
H14 H 0.3777 0.5702 0.4779 0.094 Uiso 1 1 calc R A 1 
C15 C 0.2454(4) 0.7984(4) 0.6164(2) 0.1180(13) Uani 1 1 d . A 1 
H15 H 0.2151 0.8230 0.6862 0.142 Uiso 1 1 calc R A 1 
C17 C 0.2374(4) 0.8772(3) 0.5353(2) 0.0988(9) Uani 1 1 d . A 1 
H17 H 0.2036 0.9547 0.5502 0.119 Uiso 1 1 calc R A 1 
C18 C 0.9503(6) 0.5236(2) -0.1770(2) 0.1077(11) Uani 1 1 d . A 1 
H18 H 1.0198 0.4754 -0.2338 0.129 Uiso 1 1 calc R A 1 
C19 C 0.2978(4) 0.6843(4) 0.5946(2) 0.1088(11) Uani 1 1 d . A 1 
H19 H 0.3033 0.6315 0.6495 0.131 Uiso 1 1 calc R A 1 
C20 C 0.7520(5) 0.5376(2) -0.1418(2) 0.0987(9) Uani 1 1 d . A 1 
H20 H 0.6889 0.4987 -0.1746 0.118 Uiso 1 1 calc R A 1 
O1A O 0.5144(14) 0.8871(9) -0.0880(7) 0.075(2) Uani 0.766(9) 1 d PU A 1 
C16A C 0.5462(13) 0.9273(9) -0.1984(8) 0.081(2) Uani 0.766(9) 1 d PU A 1 
H16A H 0.4976 1.0095 -0.2022 0.097 Uiso 0.766(9) 1 calc PR A 1 
H16B H 0.4848 0.8916 -0.2398 0.097 Uiso 0.766(9) 1 calc PR A 1 
C21A C 0.7646(5) 0.8903(3) -0.2353(3) 0.0918(15) Uani 0.766(9) 1 d PU A 1 
H21A H 0.8214 0.9236 -0.1906 0.138 Uiso 0.766(9) 1 calc PR A 1 
H21B H 0.8030 0.9149 -0.3071 0.138 Uiso 0.766(9) 1 calc PR A 1 
H21C H 0.8082 0.8087 -0.2318 0.138 Uiso 0.766(9) 1 calc PR A 1 
O1B O 0.486(5) 0.898(3) -0.084(2) 0.060(4) Uani 0.234(9) 1 d PU A 2 
C16B C 0.585(4) 0.941(3) -0.187(3) 0.065(5) Uani 0.234(9) 1 d PU A 2 
H16C H 0.4962 1.0071 -0.2101 0.079 Uiso 0.234(9) 1 calc PR A 2 
H16D H 0.6967 0.9638 -0.1785 0.079 Uiso 0.234(9) 1 calc PR A 2 
C21B C 0.646(3) 0.8520(13) -0.2665(11) 0.111(5) Uani 0.234(9) 1 d PU A 2 
H21D H 0.7576 0.7955 -0.2533 0.166 Uiso 0.234(9) 1 calc PR A 2 
H21E H 0.6798 0.8843 -0.3356 0.166 Uiso 0.234(9) 1 calc PR A 2 
H21F H 0.5425 0.8172 -0.2631 0.166 Uiso 0.234(9) 1 calc PR A 2 
 
loop_ 
 _atom_site_aniso_label 
 _atom_site_aniso_U_11 
 _atom_site_aniso_U_22 
 _atom_site_aniso_U_33 
 _atom_site_aniso_U_23 
 _atom_site_aniso_U_13 
 _atom_site_aniso_U_12 
O4A 0.0386(17) 0.081(3) 0.093(4) -0.006(2) -0.010(2) -0.008(2) 
C22A 0.062(2) 0.114(4) 0.106(4) 0.005(3) -0.003(2) -0.032(3) 
C23A 0.075(3) 0.156(6) 0.167(5) 0.052(4) -0.007(3) -0.044(3) 
O4B 0.044(7) 0.075(9) 0.060(5) -0.013(6) -0.001(4) -0.017(6) 
C22B 0.046(5) 0.085(8) 0.095(8) -0.021(6) -0.004(4) -0.026(5) 
C23B 0.096(8) 0.150(12) 0.112(9) -0.015(8) -0.016(6) -0.037(7) 
C24 0.0670(12) 0.0685(12) 0.0613(11) -0.0087(9) -0.0205(9) -0.0073(9) 
N1 0.0421(8) 0.0790(11) 0.0563(9) -0.0145(7) -0.0184(6) 0.0064(7) 
O3 0.0582(9) 0.1040(12) 0.0681(9) -0.0233(8) -0.0098(7) 0.0193(8) 
C1 0.0418(9) 0.0812(14) 0.0579(10) -0.0190(10) -0.0174(8) -0.0016(9) 
C2 0.0428(9) 0.0574(10) 0.0576(10) -0.0163(7) -0.0169(7) -0.0004(7) 
C3 0.0452(9) 0.0717(11) 0.0542(10) -0.0150(8) -0.0144(7) 0.0021(8) 
C4 0.0434(9) 0.0597(10) 0.0579(10) -0.0183(8) -0.0155(7) -0.0004(7) 
C5 0.0518(10) 0.0470(9) 0.0572(10) -0.0016(7) -0.0089(8) 0.0001(7) 
C6 0.0441(9) 0.0652(11) 0.0710(11) -0.0179(9) -0.0180(8) -0.0014(8) 
C7 0.0378(8) 0.0619(10) 0.0588(10) 0.0024(8) -0.0153(7) -0.0093(7) 
O6 0.0887(12) 0.0718(10) 0.1019(12) -0.0231(9) -0.0392(10) 0.0266(8) 
C8 0.0449(9) 0.0653(11) 0.0550(10) -0.0164(8) -0.0163(7) 0.0001(8) 
O2 0.0669(10) 0.1415(17) 0.0736(10) 0.0108(10) -0.0216(8) 0.0179(10) 
C9 0.0527(12) 0.0769(13) 0.0622(11) -0.0110(9) -0.0157(9) 0.0095(9) 
O5 0.0543(9) 0.1411(17) 0.1291(15) -0.0715(13) -0.0326(9) -0.0036(9) 
C10 0.0441(9) 0.0549(10) 0.0718(11) -0.0111(8) -0.0215(8) 0.0002(7) 
C11 0.0545(11) 0.0682(12) 0.0747(13) 0.0083(10) -0.0028(9) 0.0027(9) 
C12 0.0799(14) 0.0594(11) 0.0664(12) -0.0108(9) -0.0137(10) -0.0122(10) 
C13 0.0794(15) 0.0813(16) 0.0730(14) 0.0085(12) 0.0135(12) 0.0153(13) 
C14 0.0558(12) 0.0925(16) 0.0864(16) 0.0268(12) -0.0207(10) -0.0208(11) 
C15 0.0684(16) 0.218(4) 0.0515(13) -0.0215(19) -0.0113(11) -0.009(2) 
C17 0.0883(17) 0.120(2) 0.0815(17) -0.0426(16) -0.0258(13) -0.0002(15) 
C18 0.133(3) 0.0785(17) 0.0660(15) -0.0123(12) 0.0121(16) 0.0200(17) 
C19 0.0710(16) 0.179(3) 0.0661(16) 0.0360(19) -0.0113(12) -0.0281(19) 
C20 0.141(3) 0.0700(15) 0.0791(16) -0.0229(12) -0.0232(17) -0.0142(15) 
O1A 0.052(3) 0.084(3) 0.067(2) 0.0060(18) -0.0043(17) 0.0064(19) 
C16A 0.073(4) 0.088(4) 0.069(3) 0.007(2) -0.010(3) -0.005(3) 
C21A 0.079(2) 0.083(2) 0.092(2) 0.0098(17) 0.0038(17) -0.0081(17) 
O1B 0.048(8) 0.064(6) 0.069(8) -0.003(5) -0.025(6) -0.003(6) 
C16B 0.070(9) 0.058(7) 0.065(7) 0.009(5) -0.023(6) -0.008(6) 
C21B 0.133(10) 0.103(8) 0.095(7) -0.019(6) -0.019(6) -0.030(7) 
 
_geom_special_details 
; 
 All esds (except the esd in the dihedral angle between two l.s. planes) 
 are estimated using the full covariance matrix.  The cell esds are taken 
 into account individually in the estimation of esds in distances, angles 
 and torsion angles; correlations between esds in cell parameters are only 
 used when they are defined by crystal symmetry.  An approximate (isotropic) 
 treatment of cell esds is used for estimating esds involving l.s. planes. 
; 
 
loop_ 
 _geom_bond_atom_site_label_1 
 _geom_bond_atom_site_label_2 
 _geom_bond_distance 
 _geom_bond_site_symmetry_2 
 _geom_bond_publ_flag 
O4A C1 1.291(10) . ? 
O4A C22A 1.440(10) . ? 
C22A C23A 1.450(11) . ? 
O4B C22B 1.51(3) . ? 
C22B C23B 1.51(3) . ? 
C24 C7 1.378(3) . ? 
C24 C17 1.385(3) . ? 
N1 C8 1.346(2) . ? 
N1 C3 1.364(2) . ? 
O3 C1 1.194(2) . ? 
C1 C8 1.474(3) . ? 
C2 C8 1.392(2) . ? 
C2 C4 1.413(3) . ? 
C2 C10 1.484(3) . ? 
C3 C4 1.387(2) . ? 
C3 C9 1.458(3) . ? 
C4 C6 1.499(2) . ? 
C5 C12 1.373(3) . ? 
C5 C11 1.399(3) . ? 
C5 C6 1.474(3) . ? 
C6 O5 1.208(2) . ? 
C7 C14 1.385(3) . ? 
C7 C10 1.478(3) . ? 
O6 C10 1.213(2) . ? 
O2 C9 1.201(3) . ? 
C9 O1A 1.362(10) . ? 
C11 C13 1.360(3) . ? 
C12 C20 1.385(3) . ? 
C13 C18 1.347(5) . ? 
C14 C19 1.365(4) . ? 
C15 C19 1.368(5) . ? 
C15 C17 1.381(5) . ? 
C18 C20 1.385(5) . ? 
O1A C16A 1.471(14) . ? 
C16A C21A 1.509(10) . ? 
O1B C16B 1.50(5) . ? 
C16B C21B 1.45(3) . ? 
 
loop_ 
 _geom_angle_atom_site_label_1 
 _geom_angle_atom_site_label_2 
 _geom_angle_atom_site_label_3 
 _geom_angle 
 _geom_angle_site_symmetry_1 
 _geom_angle_site_symmetry_3 
 _geom_angle_publ_flag 
C1 O4A C22A 117.4(6) . . ? 
O4A C22A C23A 109.3(6) . . ? 
C23B C22B O4B 108.8(17) . . ? 
C7 C24 C17 119.8(2) . . ? 
C8 N1 C3 109.73(15) . . ? 
O3 C1 O4A 123.1(4) . . ? 
O3 C1 C8 123.7(2) . . ? 
O4A C1 C8 113.1(4) . . ? 
C8 C2 C4 106.75(16) . . ? 
C8 C2 C10 127.93(17) . . ? 
C4 C2 C10 125.31(15) . . ? 
N1 C3 C4 108.14(17) . . ? 
N1 C3 C9 119.10(17) . . ? 
C4 C3 C9 132.75(18) . . ? 
C3 C4 C2 106.87(15) . . ? 
C3 C4 C6 128.51(18) . . ? 
C2 C4 C6 124.19(16) . . ? 
C12 C5 C11 119.54(19) . . ? 
C12 C5 C6 122.03(17) . . ? 
C11 C5 C6 118.39(18) . . ? 
O5 C6 C5 121.88(17) . . ? 
O5 C6 C4 117.57(17) . . ? 
C5 C6 C4 120.48(15) . . ? 
C24 C7 C14 119.4(2) . . ? 
C24 C7 C10 121.76(17) . . ? 
C14 C7 C10 118.77(19) . . ? 
N1 C8 C2 108.51(16) . . ? 
N1 C8 C1 119.81(16) . . ? 
C2 C8 C1 131.68(18) . . ? 
O2 C9 O1A 125.8(5) . . ? 
O2 C9 C3 123.4(2) . . ? 
O1A C9 C3 110.8(4) . . ? 
O6 C10 C7 121.22(18) . . ? 
O6 C10 C2 119.63(18) . . ? 
C7 C10 C2 119.11(15) . . ? 
C13 C11 C5 120.1(3) . . ? 
C5 C12 C20 119.5(2) . . ? 
C18 C13 C11 120.4(3) . . ? 
C19 C14 C7 120.6(3) . . ? 
C19 C15 C17 120.2(3) . . ? 
C15 C17 C24 119.8(3) . . ? 
C13 C18 C20 120.8(2) . . ? 
C14 C19 C15 120.1(3) . . ? 
C18 C20 C12 119.6(3) . . ? 
C9 O1A C16A 111.8(8) . . ? 
O1A C16A C21A 102.1(7) . . ? 
C21B C16B O1B 109(2) . . ? 
 
_diffrn_measured_fraction_theta_max    0.993 
_diffrn_reflns_theta_full              26.00 
_diffrn_measured_fraction_theta_full   0.993 
_refine_diff_density_max    0.471 
_refine_diff_density_min   -0.488 
_refine_diff_density_rms    0.145 
